# Supplementary material for: Rational Design of Photocontrolled Rectifier Switches in Single-Molecule Junctions Based on Diarylethene
Source: MDPI journal article supplement (doi:10.3390/molecules28207158), 2023-10-18
Supplement: s1 [file s1]

# Supplementary Materials

## **Rational Design of Photocontrolled Rectifier Switches in Single-Molecule Junctions Based on Diarylethene**

Ziye Wu<sup>1</sup>, Peng Cui<sup>1</sup> and Mingsen Deng<sup>1,2,\*</sup>

<sup>1</sup> *School of Information, Guizhou University of Finance and Economics, Guiyang 550025, China*

<sup>2</sup> *Guizhou Provincial Key Laboratory of Computational Nano-Material Science, Guizhou Education University, Guiyang 550018, China*

\* Correspondence: [deng@gznc.edu.cn](mailto:deng@gznc.edu.cn)

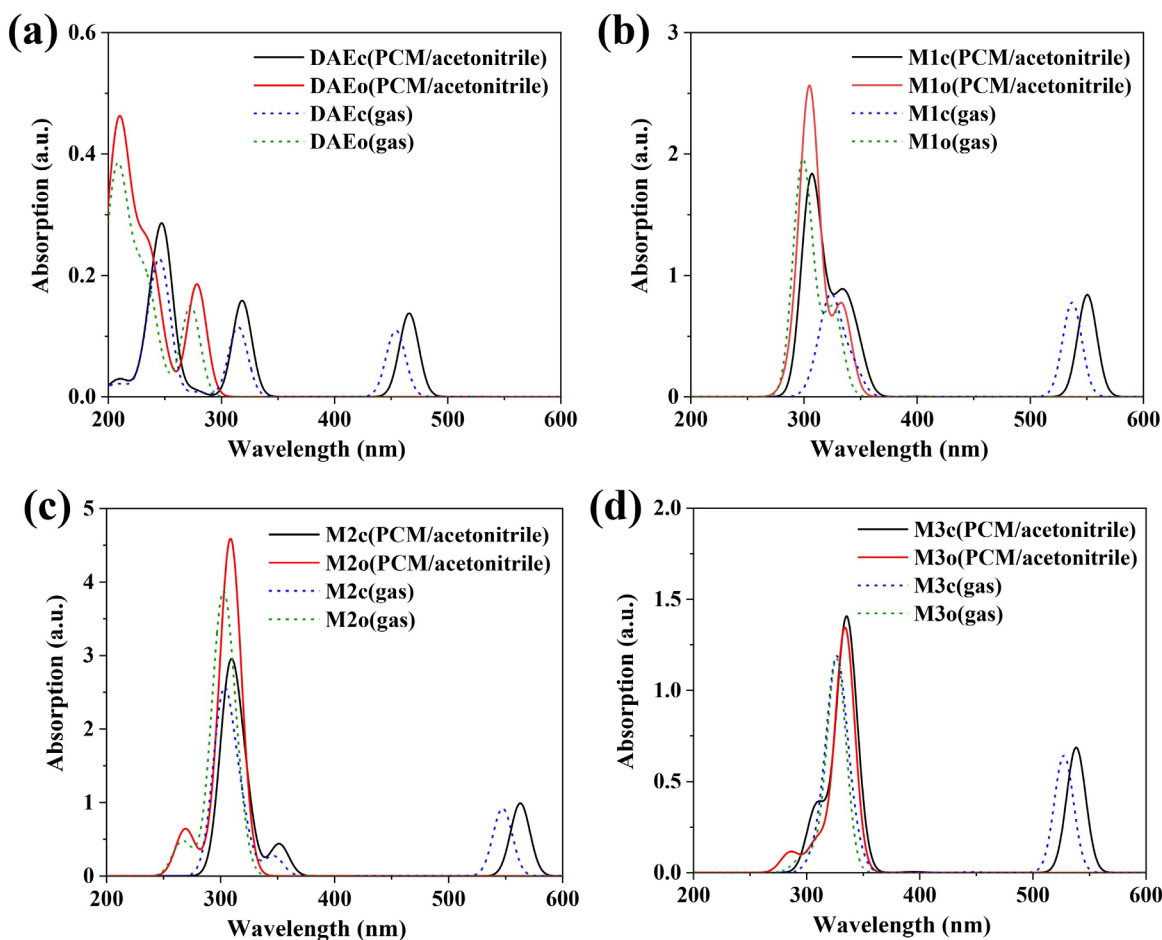

**Figure S1.** Calculated UV/Vis spectra of DAE (a), M1 (b), M2 (c) and M3 (d) respectively, performed using Gaussian 09 software at theoretical level TD-DFT/CAM-B3LYP/6-311G(d,p)/PCM(acetonitrile) and TD-DFT/CAM-B3LYP/6-311G(d,p)/gas.

**Table S1.** Molecular orbital energies of molecule M1~M3 calculated at theoretical level TD-DFT/CAM-B3LYP/6-311G(d,p)/gas using Gaussian 09 software.

| Energy of molecular orbital (eV) | M1          |           | M2          |           | M3          |           |
|----------------------------------|-------------|-----------|-------------|-----------|-------------|-----------|
|                                  | Closed form | Open form | Closed form | Open form | Closed form | Open form |
| LUMO+1                           | -2.09       | -1.03     | -0.92       | -0.80     | -2.86       | -2.76     |
| LUMO                             | -2.86       | -2.76     | -2.10       | -0.89     | -2.87       | -2.77     |
| HOMO                             | -6.63       | -7.01     | -6.57       | -7.01     | -6.69       | -7.66     |
| HOMO-1                           | -7.12       | -7.19     | -7.11       | -7.02     | -8.06       | -8.01     |
| Gap                              | 3.77        | 4.25      | 4.47        | 6.12      | 3.82        | 4.89      |

**Table S2.** Molecular orbital energies of molecule M1~M3 calculated at theoretical level TD-DFT/CAM-B3LYP/6-311G(d,p)/PCM(acetonitrile) using Gaussian 09 software.

| Energy of molecular orbital (eV) | M1          |           | M2          |           | M3          |           |
|----------------------------------|-------------|-----------|-------------|-----------|-------------|-----------|
|                                  | Closed form | Open form | Closed form | Open form | Closed form | Open form |
| LUMO+1                           | -2.17       | -0.88     | -0.98       | -0.85     | -2.56       | -2.53     |
| LUMO                             | -2.57       | -2.53     | -2.21       | -0.90     | -2.57       | -2.53     |
| HOMO                             | -6.71       | -7.06     | -6.66       | -7.10     | -6.77       | -7.61     |
| HOMO-1                           | -7.01       | -7.23     | -7.10       | -7.10     | -8.14       | -7.98     |
| Gap                              | 4.14        | 4.53      | 4.45        | 6.15      | 4.20        | 5.08      |

**Table S3.** Molecular orbital energies of donor, DAE and acceptor calculated at theoretical level TD-DFT/CAM-B3LYP/6-311G(d,p)/gas using Gaussian 09 software.

| Energy of molecular orbital (eV) | Donor | DAE         |           | Acceptor |
|----------------------------------|-------|-------------|-----------|----------|
|                                  |       | Closed form | Open form |          |
| LUMO+1                           | 0.26  | 0.42        | 0.39      | -0.66    |
| LUMO                             | -0.61 | -1.66       | -0.66     | -2.62    |
| HOMO                             | -6.79 | -6.96       | -7.99     | -8.72    |
| HOMO-1                           | -7.73 | -8.19       | -8.42     | -9.45    |
| Gap                              | 6.18  | 5.30        | 7.33      | 6.10     |

**Table S4.** Molecular orbital energies of donor, DAE and acceptor calculated at theoretical level TD-DFT/CAM-B3LYP/6-311G(d,p)/PCM(acetonitrile) using Gaussian 09 software.

| Energy of molecular orbital (eV) | Donor | DAE         |           | Acceptor |
|----------------------------------|-------|-------------|-----------|----------|
|                                  |       | Closed form | Open form |          |
| LUMO+1                           | 0.10  | 0.54        | 0.52      | -0.43    |
| LUMO                             | -0.75 | -1.55       | -0.61     | -2.43    |
| HOMO                             | -6.93 | -6.82       | -7.87     | -8.49    |
| HOMO-1                           | -7.89 | -8.07       | -8.27     | -9.16    |
| Gap                              | 6.18  | 5.27        | 7.26      | 6.06     |

**Table S5.** Transferred electrons between fragments in molecule M1~M3 analyzed by Multiwfn 3.8 (dev) program based on the TD-DFT calculations at theoretical level TD-DFT/CAM-B3LYP/6-311G(d,p)/gas.

| Molecule | Excited state <sup>a</sup> | Transferred electrons (e <sup>-</sup> ) |                 |                 |
|----------|----------------------------|-----------------------------------------|-----------------|-----------------|
|          |                            | X1→Switch                               | Switch→X2       | X1→X2           |
| M1c      | S <sub>1</sub>             | -0.00972                                | 0.01550         | 0.00039         |
|          | S <sub>2</sub>             | 0.00000                                 | 0.92577         | 0.02587         |
|          | S <sub>3</sub>             | 0.36276                                 | 0.00005         | 0.00533         |
|          | S <sub>4</sub>             | -0.00012                                | 0.01686         | 0.00077         |
|          | S <sub>5</sub>             | 0.00000                                 | 0.00007         | 0.99992         |
|          | <b>Sum</b>                 | <b>0.35292</b>                          | <b>0.95825</b>  | <b>1.03228</b>  |
| M1o      | S <sub>1</sub>             | 0.00000                                 | 0.86831         | 0.04157         |
|          | S <sub>2</sub>             | 0.03335                                 | 0.00000         | 0.00000         |
|          | S <sub>3</sub>             | 0.00000                                 | 0.00000         | 1.00000         |
|          | S <sub>4</sub>             | 0.00000                                 | -0.00018        | -0.00033        |
|          | S <sub>5</sub>             | 0.00000                                 | 0.63713         | 0.29657         |
|          | <b>Sum</b>                 | <b>0.03335</b>                          | <b>1.50526</b>  | <b>1.33781</b>  |
| M2c      | S <sub>1</sub>             | -0.01131                                | 0.01211         | 0.00003         |
|          | S <sub>2</sub>             | 0.35834                                 | 0.00004         | 0.00663         |
|          | S <sub>3</sub>             | 0.00276                                 | 0.00433         | 0.00031         |
|          | S <sub>4</sub>             | -0.00021                                | -0.36051        | -0.00679        |
|          | S <sub>5</sub>             | -0.07020                                | 0.07123         | -0.00066        |
|          | <b>Sum</b>                 | <b>0.27938</b>                          | <b>-0.27280</b> | <b>-0.00048</b> |
| M2o      | S <sub>1</sub>             | 0.03023                                 | -0.00005        | -0.00047        |
|          | S <sub>2</sub>             | 0.00000                                 | -0.03188        | 0.00000         |
|          | S <sub>3</sub>             | -0.00746                                | 0.00585         | -0.00028        |
|          | S <sub>4</sub>             | -0.00082                                | 0.00081         | -0.00030        |
|          | S <sub>5</sub>             | -0.00174                                | 0.00072         | -0.00141        |
|          | <b>Sum</b>                 | <b>0.02021</b>                          | <b>-0.02455</b> | <b>-0.00246</b> |
| M3c      | S <sub>1</sub>             | -0.01509                                | 0.01583         | 0.00001         |
|          | S <sub>2</sub>             | -0.00651                                | 0.93091         | 0.01006         |
|          | S <sub>3</sub>             | -0.93192                                | 0.00651         | -0.01122        |
|          | S <sub>4</sub>             | -0.02054                                | 0.02083         | 0.00002         |
|          | S <sub>5</sub>             | 0.00108                                 | -0.00116        | -0.00016        |
|          | <b>Sum</b>                 | <b>-0.97298</b>                         | <b>0.97292</b>  | <b>-0.00129</b> |
| M3o      | S <sub>1</sub>             | -0.80717                                | 0.00000         | -0.00032        |
|          | S <sub>2</sub>             | 0.00000                                 | 0.90863         | 0.00242         |
|          | S <sub>3</sub>             | -0.00013                                | 0.00009         | 0.00000         |
|          | S <sub>4</sub>             | 0.00001                                 | -0.00001        | -0.00022        |
|          | S <sub>5</sub>             | 0.00000                                 | 0.25944         | 0.00284         |
|          | <b>Sum</b>                 | <b>-0.80729</b>                         | <b>1.16815</b>  | <b>0.00472</b>  |

<sup>a</sup> S<sub>1</sub>~S<sub>5</sub> denote the first to fifth excited states, respectively.

**Table S6.** Transferred electrons between fragments in molecule M1~M3 analyzed by Multiwfn 3.8 (dev) program based on the TD-DFT calculations at theoretical level TD-DFT/CAM-B3LYP/6-311G(d,p)/PCM(acetonitrile).

| Molecule | Excited state <sup>a</sup> | Transferred electrons (e <sup>-</sup> ) |                 |                 |
|----------|----------------------------|-----------------------------------------|-----------------|-----------------|
|          |                            | X1→Switch                               | Switch→X2       | X1→X2           |
| M1c      | S <sub>1</sub>             | -0.00931                                | 0.01081         | 0.00025         |
|          | S <sub>2</sub>             | 0.00000                                 | 0.91113         | 0.02490         |
|          | S <sub>3</sub>             | 0.44332                                 | -0.00019        | 0.00504         |
|          | S <sub>4</sub>             | 0.00876                                 | 0.01149         | 0.00099         |
|          | S <sub>5</sub>             | 0.00001                                 | -0.00109        | 0.00023         |
|          | <b>Sum</b>                 | <b>0.44278</b>                          | <b>0.93215</b>  | <b>0.03116</b>  |
| M1o      | S <sub>1</sub>             | 0.00000                                 | -0.00088        | 0.00021         |
|          | S <sub>2</sub>             | 0.04371                                 | 0.00000         | 0.00000         |
|          | S <sub>3</sub>             | 0.00000                                 | 0.79770         | 0.02454         |
|          | S <sub>4</sub>             | -0.01689                                | 0.00009         | 0.00024         |
|          | S <sub>5</sub>             | 0.00000                                 | 0.13345         | 0.02253         |
|          | <b>Sum</b>                 | <b>0.02682</b>                          | <b>0.93036</b>  | <b>0.04752</b>  |
| M2c      | S <sub>1</sub>             | -0.00744                                | 0.00910         | 0.00006         |
|          | S <sub>2</sub>             | 0.45167                                 | 0.00002         | 0.00758         |
|          | S <sub>3</sub>             | -0.00004                                | -0.44558        | -0.00861        |
|          | S <sub>4</sub>             | 0.00805                                 | -0.00526        | 0.00014         |
|          | S <sub>5</sub>             | -0.04517                                | 0.04777         | 0.00000         |
|          | <b>Sum</b>                 | <b>0.40707</b>                          | <b>-0.39395</b> | <b>-0.00083</b> |
| M2o      | S <sub>1</sub>             | 0.04298                                 | 0.00054         | 0.00004         |
|          | S <sub>2</sub>             | 0.00004                                 | 0.00008         | -0.04629        |
|          | S <sub>3</sub>             | -0.01611                                | 0.01415         | 0.00051         |
|          | S <sub>4</sub>             | 0.00296                                 | 0.00409         | 0.00131         |
|          | S <sub>5</sub>             | -0.00655                                | 0.00663         | 0.00118         |
|          | <b>Sum</b>                 | <b>0.02332</b>                          | <b>0.02549</b>  | <b>-0.04325</b> |
| M3c      | S <sub>1</sub>             | -0.00943                                | 0.01022         | 0.00001         |
|          | S <sub>2</sub>             | -0.00002                                | 0.92376         | 0.01074         |
|          | S <sub>3</sub>             | -0.92486                                | 0.00002         | -0.01117        |
|          | S <sub>4</sub>             | -0.01366                                | 0.01431         | 0.00008         |
|          | S <sub>5</sub>             | 0.00014                                 | -0.00015        | -0.00018        |
|          | <b>Sum</b>                 | <b>-0.94783</b>                         | <b>0.94816</b>  | <b>-0.00052</b> |
| M3o      | S <sub>1</sub>             | -0.76533                                | 0.00000         | -0.00105        |
|          | S <sub>2</sub>             | -0.00045                                | 0.00024         | 0.00000         |
|          | S <sub>3</sub>             | 0.00002                                 | -0.00005        | -0.00034        |
|          | S <sub>4</sub>             | -0.00018                                | 0.77807         | 0.00105         |
|          | S <sub>5</sub>             | 0.00000                                 | 0.18201         | 0.00073         |
|          | <b>Sum</b>                 | <b>-0.76594</b>                         | <b>0.96027</b>  | <b>0.00039</b>  |

<sup>a</sup> S<sub>1</sub>~S<sub>5</sub> denote the first to fifth excited states, respectively.

**Table S7.** Molecule-projected self-consistent Hamiltonian (MPSH) eigenvalues of each molecule in single-molecule junctions simulated by QuatumATK software.

| MPSH<br>eigenvalues<br>(eV) | M1             |              | M2             |              | M3             |              |
|-----------------------------|----------------|--------------|----------------|--------------|----------------|--------------|
|                             | Closed<br>form | Open<br>form | Closed<br>form | Open<br>form | Closed<br>form | Open<br>form |
| LUMO+2                      | 1.44           | 1.67         | 1.48           | 1.74         | 0.74           | 1.36         |
| LUMO+1                      | 0.68           | 1.41         | 1.47           | 1.61         | 0.20           | 0.34         |
| LUMO                        | 0.19           | 0.30         | 0.60           | 1.60         | 0.19           | 0.31         |
| HOMO                        | -0.22          | -0.74        | -0.28          | -0.87        | -0.18          | -0.59        |
| HOMO-1                      | -1.15          | -0.92        | -0.92          | -1.03        | -1.48          | -0.81        |
| Gap                         | 0.41           | 1.04         | 0.88           | 2.47         | 0.37           | 0.90         |
